# Supplementary material
Source: publisher figshare collection journal article supplement (https://gsapubs.figshare.com/ndownloader/files/22756241)
Supplement: Supplementary file 1 [file 22756241]

# Upper Mississippian to Middle Pennsylvanian stratigraphic section Pottsville, Pennsylvania

Jeffrey Ross Levine\*, Department of Geological Sciences, McGill University, Montréal, Québec HA3 2A7, Canada

Rudy Slingerland, Department of Geosciences, The Pennsylvania State University, University Park, Pennsylvania 16802

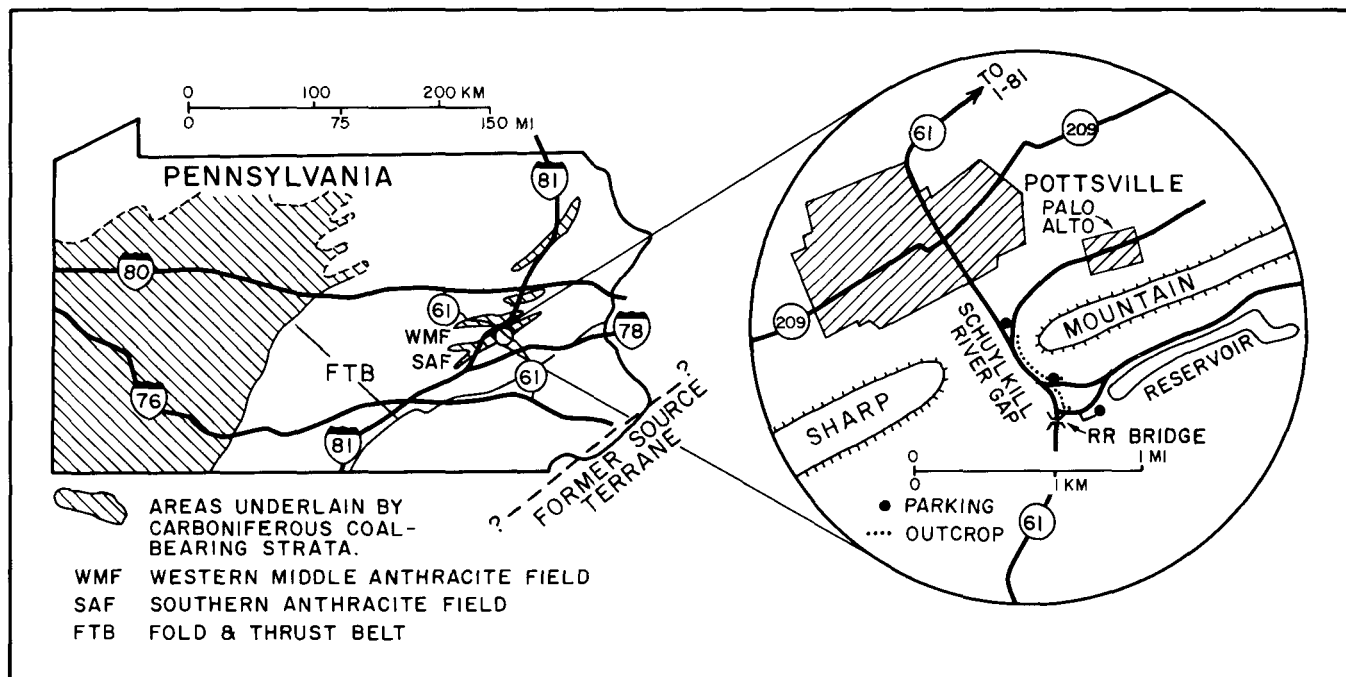

Figure 1. Key map of field locality.

## LOCATION AND ACCESSIBILITY

The rocks at this site are exposed along a road cut on the eastern side of Pennsylvania 61, 0.3 to 0.5 mi (0.4 to 0.8 km) south of Pottsville, Pennsylvania (Fig. 1), on the southern margin of the Southern Anthracite field where the Schuylkill River has cut a deep gap in Sharp Mountain. Parking is available at several places, but it is advantageous to begin at the southern end of the outcrop and walk up section.

## SIGNIFICANCE OF SITE

The outcrop exposes a 2,000-ft (600+-m)-thick section of upper Carboniferous molasse, representing the northwestward influx of elastic detritus into the Appalachian foreland basin from an orogenic source terrane formerly situated along the present Atlantic Coastal Plain. The alternation of facies (Fig. 2) reflects the gradual but progressive evolution of depositional environments from a semi-arid alluvial plain (Mauch Chunk Formation), to a semi-humid alluvial plain (Pottsville Formation), to a humid alluvial plain dominated by peat swamps (Llewellyn Formation).

\*Present address: School of Mines and Energy Development, The University of Alabama, Drawer AY, Tuscaloosa, Alabama 35487-1489.

This transition, documented by dramatic changes in sedimentary facies, facies sequences, and maximum clast sizes, clearly reflects regional (perhaps even world-wide) climatic changes occurring near the end of the Mississippian; however, incipient Alleghanian tectonism and the evolution of many new plant groups occurring at this time may have played an influential role as well.

Subsequent to their deposition, the Carboniferous sediments were deeply buried, metamorphosed, tectonically deformed in the Alleghanian orogeny, uplifted, and largely eroded. The Southern Anthracite field now preserves the thickest, coarsest-grained, most proximal to the source, and most stratigraphically continuous occurrence of upper Carboniferous molasse in the central Appalachians.

## STRATIGRAPHIC AND GEOMORPHIC OVERVIEW

Molasse sediments of the Anthracite region are stratigraphically subdivided on the basis of grain size and predominant coloration (Wood and others, 1969). The fine-grained, red Mauch Chunk Formation (Middle to Upper Mississippian) intertongues with and is replaced by the coarse-grained, gray Pottsville Formation (Lower to Middle Pennsylvanian), which in turn gives way

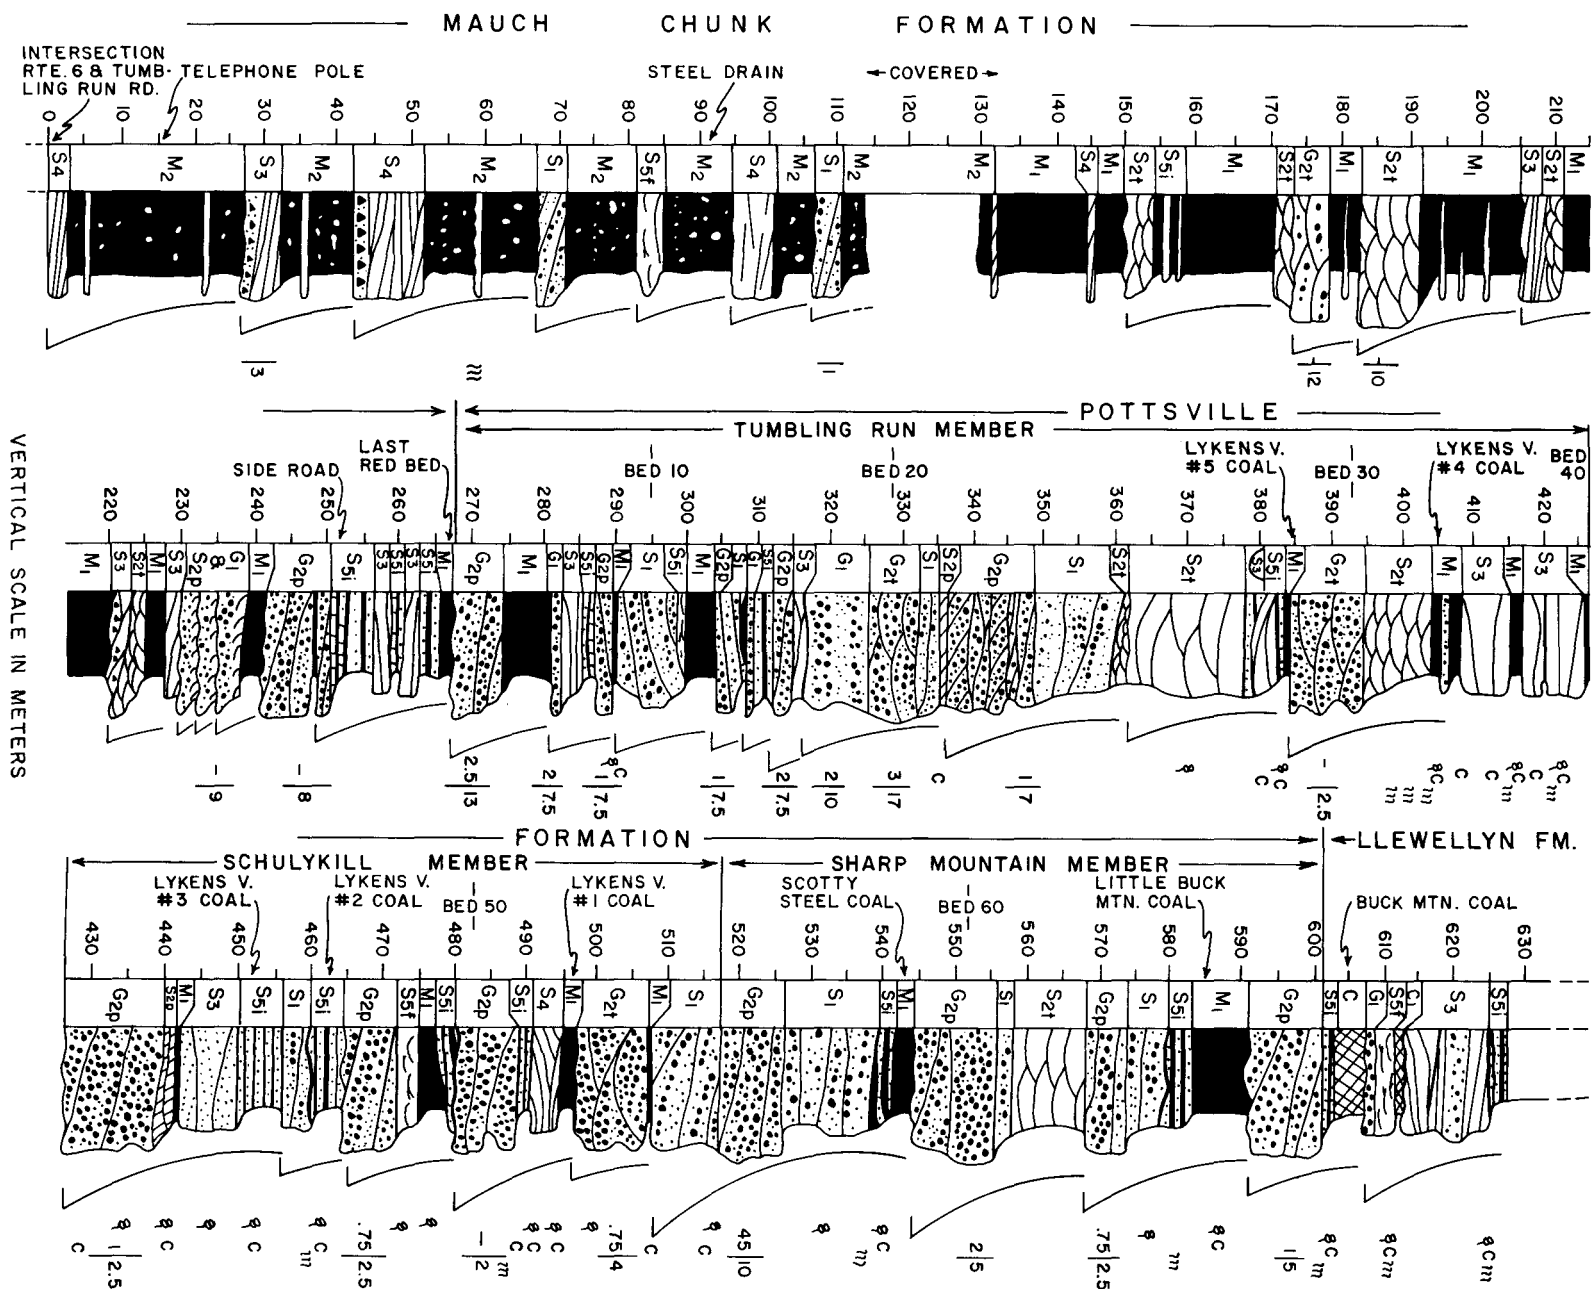

**TABLE 1 — FACIES STATES, SEQUENCES, COMPOSITION, AND FEATURES OF POTTSVILLE SECTION.**

| CODE:                                | G <sub>1</sub>                                                                                                                                                                                                                                                                                                                                                                                                                                                                                                                                                                                                                                                                                                                                                                                                                                             | G <sub>2T&amp;P</sub>                                                     | S <sub>1</sub>                                                         | S <sub>2T&amp;P</sub>                                                                    | S <sub>3</sub>                                                                              | S <sub>4</sub>                                                                 | S <sub>5F&amp;I</sub>                                                                                                                        | M <sub>1</sub>                                    | M <sub>2</sub>                                           | C                                                                                                                                                                          |  |                                                |
|--------------------------------------|------------------------------------------------------------------------------------------------------------------------------------------------------------------------------------------------------------------------------------------------------------------------------------------------------------------------------------------------------------------------------------------------------------------------------------------------------------------------------------------------------------------------------------------------------------------------------------------------------------------------------------------------------------------------------------------------------------------------------------------------------------------------------------------------------------------------------------------------------------|---------------------------------------------------------------------------|------------------------------------------------------------------------|------------------------------------------------------------------------------------------|---------------------------------------------------------------------------------------------|--------------------------------------------------------------------------------|----------------------------------------------------------------------------------------------------------------------------------------------|---------------------------------------------------|----------------------------------------------------------|----------------------------------------------------------------------------------------------------------------------------------------------------------------------------|--|------------------------------------------------|
| SYMBOL:                              |                                                                                                                                                                                                                                                                                                                                                                                                                                                                                                                                                                                                                                                                                                                                                                                                                                                            |                                                                           |                                                                        |                                                                                          |                                                                                             |                                                                                |                                                                                                                                              |                                                   |                                                          |                                                                                                                                                                            |  |                                                |
| NAME:                                | Crudely bedded sandy conglom.                                                                                                                                                                                                                                                                                                                                                                                                                                                                                                                                                                                                                                                                                                                                                                                                                              | Cross bedded sandy conglom.                                               | Plane bedded pebbly sandst.                                            | Cross bedded pebbly sandst.                                                              | Coarse, plane bedded sandst.                                                                | Fine, plane bedded sandst.                                                     | Flaser or interbedded sandst. & mudst.                                                                                                       | Noncalcareous mudst.                              | Calcareous mudst.                                        | Coal                                                                                                                                                                       |  |                                                |
| COLOR:                               | Pale gray ss. with variegated conglom.                                                                                                                                                                                                                                                                                                                                                                                                                                                                                                                                                                                                                                                                                                                                                                                                                     | Dusky yellow conglom. with gray sandst.                                   | Light olive gray                                                       | Grayish orange to pink                                                                   | Pale red (Mauch Ch.) Pale olive (Pottsv.)                                                   | Grayish to pink                                                                | Gray red (Mauch Ch.) or dark gray (Pv.)                                                                                                      | Ruddy (MC) to light brown to black (Pv.)          | Ruddy to brown                                           | Black as coal                                                                                                                                                              |  |                                                |
| GRAIN SIZE:                          | Coarse sand to pebble conglom.                                                                                                                                                                                                                                                                                                                                                                                                                                                                                                                                                                                                                                                                                                                                                                                                                             | Pebble conglom. to very coarse sand                                       | Coarse to granule with pebbly stringers                                | Coarse to granule                                                                        | Coarse to very coarse                                                                       | Very fine to fine sand                                                         | Fine sand with interbed. mud                                                                                                                 | Fine clay to silt                                 | Fine clay & silt with carbonate concretions              | Finely macerated plant fragments                                                                                                                                           |  |                                                |
| INTERNAL BED FORMS:                  | Subhoriz. interstat. coarse sand & pebble conglom. Lenticular medium thick beds                                                                                                                                                                                                                                                                                                                                                                                                                                                                                                                                                                                                                                                                                                                                                                            | Medium to very thick lenticular beds. Matrix supported conglom. (Note 1.) | Low angle laterally contin. wedge sets Medium to thick, concave upward | Cross bedding Lg. scale trough (S <sub>2t</sub> ) or Sm. scale planar (S <sub>2p</sub> ) | Decimeter - thick tabular or wedge sets. Lateral cont. to 10s of m. Mass. or par. laminated | Tab. or wedge - shape beds. Laterally extensive thin to thick parallel laminae | Small scale cross - strata with mud flasers (S <sub>5f</sub> ) or laminated w/ mud layers (S <sub>5i</sub> ) (Note 2.)                       | Finely laminated or rooted see Note 3.            | Stratified or paleosol features (see Note 3.) M. C. only | Finely stratified but sheared during tectonic deform.                                                                                                                      |  |                                                |
| COMPOSITION MAUCH CHUNK TYPE:        | (No specific data)                                                                                                                                                                                                                                                                                                                                                                                                                                                                                                                                                                                                                                                                                                                                                                                                                                         |                                                                           |                                                                        | Maturity<br>mature                                                                       | Monoxl quartz<br>50%                                                                        | Feldspar<br>< 1%                                                               | Rock fragments plus mica.<br>Avg. 15% Generally sedimentary or low - grade metamorphic origin; primarily zircon & tourmaline.                |                                                   |                                                          | 90% of M. C. Shales are red beds (org. - void) Relatively Fe - rich. Clays: 80% illite; 20% chlorite; CaCO <sub>3</sub> & SiO <sub>2</sub> concretions in M <sub>1</sub> . |  | None                                           |
| PV. — LLEWELL. — TYPE:               | Vein Qtz > sandstone, chert, conglom., silt, and shale > low to med grade metamorph incl. phyllite, slate and schist.                                                                                                                                                                                                                                                                                                                                                                                                                                                                                                                                                                                                                                                                                                                                      |                                                                           |                                                                        | more mature                                                                              | 60%                                                                                         | < 1%                                                                           | (3 - 38%) Med. to high - grade metamorphic minerals first appear in upper Mauch Chunk indicating unroofing of these rocks in source terrane. |                                                   |                                                          | All are grey to black org. - bearing Fe - poor, Al - rich. Primarily ill. & chlor. with → 40% kaol. & pyro phyllite. No caliche.                                           |  | > 92% fixed carbon, dry mineral matter - free. |
| TYPICAL BASE:                        | Undulatory, sharp                                                                                                                                                                                                                                                                                                                                                                                                                                                                                                                                                                                                                                                                                                                                                                                                                                          | Undulatory, sharp, erosive                                                | Undulatory, sharp, erosive                                             | Gradational from S <sub>1</sub> or erosive from M <sub>1</sub>                           | Gradational or sharp                                                                        | Sharp, planar dips to 15°                                                      | Gradational from S <sub>1</sub> or S <sub>3</sub>                                                                                            | Gradational from S <sub>2</sub> or S <sub>5</sub> | Gradational                                              | Gradational from M <sub>1</sub>                                                                                                                                            |  |                                                |
| TOP:                                 | Gradational                                                                                                                                                                                                                                                                                                                                                                                                                                                                                                                                                                                                                                                                                                                                                                                                                                                | Grades to S <sub>2t</sub>                                                 | Sharp, undulatory, fine - gr.                                          | Grad. to S <sub>2t</sub> or M <sub>1</sub>                                               | Grad. to S <sub>2t</sub> or S <sub>3t</sub>                                                 | Grad. to M <sub>2</sub>                                                        | Grad. to S <sub>1</sub> or M <sub>2</sub>                                                                                                    | Sharp or erosive                                  | Sharp or erosive                                         | Eros. to G <sub>2</sub> Grad. to M <sub>1</sub>                                                                                                                            |  |                                                |
| NOTES:                               | 1. G <sub>2</sub> bed continuity ranges from 3m to across outcrop. Lenses subparallel to 2nd - order truncation surfaces; either laterally extensive tangential low angle (<15°) planar cross - strata (G <sub>2p</sub> ) or large - scale (2 - 4 m) cut - and - fill troughs (G <sub>2t</sub> )<br>2. S <sub>2</sub> unit contains abundant dark brown calcareous root traces, desiccation cracks, and raindrop impressions in Mauch Chunk or plant fragments in Pottsville.<br>3. Paleosol features of M <sub>1</sub> & M <sub>2</sub> : In Mauch Chunk, paleosols are "vertisols" with wetting/drying features, including wedge - shaped peds, blocky joints, mud cracks, raindrop impressions, pre-tectonic slickensides, & caliche. Paleosols in Pottsville Fm. are "underclays" with abundant root impressions, leached clay minerals, & no bedding. |                                                                           |                                                                        |                                                                                          |                                                                                             |                                                                                |                                                                                                                                              |                                                   |                                                          |                                                                                                                                                                            |  |                                                |
| OTHER SYMBOLS:                       | ▲▲▲ Intraformational conglomerate      ~~~~ Root traces      C Carbonaceous      3/10 average (3) and maximum (10) clast size in centimeters      Fining and thinning upward cycle<br>◼◼◼ Calcareous concretions      ◉ Plant fragments      ~ Erosional contact      Disconformity                                                                                                                                                                                                                                                                                                                                                                                                                                                                                                                                                                        |                                                                           |                                                                        |                                                                                          |                                                                                             |                                                                                |                                                                                                                                              |                                                   |                                                          |                                                                                                                                                                            |  |                                                |
| TRANSITION MATRIX SUMMARY SEQUENCES: | Mauch Chunk No. 1      S <sub>4</sub> → M <sub>2</sub> Mauch Chunk No. 2      S <sub>3</sub> → S <sub>2t</sub> → M <sub>1</sub> Pottsville      G <sub>2p</sub> → S <sub>1</sub> → S <sub>2t</sub> → M <sub>1</sub>                                                                                                                                                                                                                                                                                                                                                                                                                                                                                                                                                                                                                                        |                                                                           |                                                                        |                                                                                          |                                                                                             |                                                                                |                                                                                                                                              |                                                   |                                                          |                                                                                                                                                                            |  |                                                |

(Compositional information from Meckel, 1967; Wood et al., 1969; Holbrook, 1970; Hosterman et al., 1970)

to the finer-grained, gray to black, coal-rich Llewellyn Formation (Middle Pennsylvanian), representing the youngest extant molasse in the region. The former presence of many miles (kilometers) of overlying rocks is implied by the high coal rank and compaction of the Llewellyn sediments (Paxton, 1983; Levine, 1986).

The Mauch Chunk Formation is informally subdivided into three members (Wood and others, 1969). The middle member represents the 'type' Mauch Chunk red bed lithofacies. The lower and upper members represent respectively the zones of intertonguing with the underlying Pocono Formation and the overlying Pottsville Formation. The upper contact of the Mauch Chunk is defined as the top of the uppermost Mauch Chunk-type red bed (Fig. 2).

The Pottsville Formation is formally subdivided into three members (Wood and others, 1956), each representing a crudely fining-upward megacycle. Of the three, the Tumbling Run and the Sharp Mountain members are the coarser-grained, while the intervening Schuylkill Member is finer-grained and contains a greater proportion of coal. The lower contacts of the Schuylkill

and Sharp Mountain members are defined at the base of major conglomeratic units. The base of the Schuylkill Member is by no means obvious at the outcrop, but the "Great White Egg" quartz pebble conglomerate at the base of the Sharp Mountain Member is very distinctive. The contact between the Pottsville and Llewellyn Formations is placed at the base of the lowermost thick, stratigraphically persistent coal horizon, the Buck Mountain (#5), which has been correlated over large areas of the Anthracite fields (Wood and others, 1963).

Chronostratigraphic age designations in the Anthracite region, based upon the 13 upper Paleozoic floral zones defined by Read and Mamay (1964; also see Edmunds and others, 1979, Fig. 11), indicate the Pottsville section is conformable, extending from Zone 3 in the upper Mauch Chunk Formation (Chesterian Series) to Zone 10 in the lower Llewellyn Formation (Des Moinesan/Missourian Series); however, Zones 7 and 8 have not been explicitly recognized at this site. The Mauch Chunk/Pottsville contact, occurring between Zones 3 and 4, corresponds roughly to the Mississippian/Pennsylvanian systemic boundary. In areas of the central Appalachians other than the Southern and

Middle Anthracite fields, Zones 4,5, and 6 are absent, suggesting the presence of a significant disconformity between the youngest Mississippian and oldest Pennsylvanian strata (see discussion in Edmunds and others, 1979).

The strata exposed at the site are slightly overturned and comprise part of the southern limb of the Minersville Synclorium, forming the southern margin of the Southern Anthracite field. They attained their present attitude during the late Paleozoic Alleghanian orogeny when northwest-directed tectonic forces produced a progression of reformational phases that migrated northwestward across the foreland basin. At the Pottsville site all structural phases are superposed (Wood and Bergin, 1970; Nickelsen, 1979).

The structure and stratigraphy of the upper Paleozoic molasse sequence are revealed geomorphically by the relative resistance to erosion of the near-vertical component units. The Pocono sandstone, subjacent to the Mauch Chunk Formation, upholds Second Mountain, the major ridge visible to the south of the Pottsville section. The Mauch Chunk Formation underlies the valley between Second and Sharp mountains. The distinctive double ridge of Sharp Mountain is formed by the Tumbling Run and Sharp Mountain members of the Pottsville Formation. The Schuylkill River, which excavated the gap in Sharp Mountain, flows southeasterly across the Valley and Ridge Province on its course to the Chesapeake Bay, opposite to the streams that originally deposited the Pottsville sediments.

## SEDIMENTOLOGY OF THE POTTSVILLE SECTION —FACIES STATES AND COMPOSITION

Sedimentary bed forms, sediment composition, facies sequences, and paleobotany reveal a significant alteration in paleoclimatic conditions across the Pottsville section, ranging from generally semi-arid, poorly vegetated conditions at the base to perennially humid, lush conditions at the top. Ten general facies have been defined at this site and are described in Table 1. Transition matrix analysis reveals two repeating motifs, one characteristic of the Mauch Chunk and one of the Pottsville. When compared to facies sequences from modern environments of deposition, the Mauch Chunk sequence is similar to that of Bijou Creek, Colorado, a sandy, braided, ephemeral stream subject to catastrophic floods (Miall, 1977). Facies  $S_3$  and  $S_4$  probably comprised sand flats or shallow channel deposits;  $S_{5i}$  and  $S_{2i}$  comprised waning flow deposits or overbank deposits more removed from the active channel.  $M_1$  represents intra-channel, slack water deposits and  $M_2$  represents overbank soils.

The Pottsville sequence is similar to that produced by the Donjek River, Yukon Territory, a gravel-sand mixed bedload, perennial braided stream (Miall, 1977). Facies  $G_2$ ,  $S_1$ , and  $S_3$  formed in the lower parts of the active channels by longitudinal braid bar migration. Facies  $S_{2i}$  and  $S_{5i}$  formed in the upper parts of active channels or minor channels and on the tops of braid bars. Facies  $S_3$  and  $M_1$  formed on bar tops, abandoned channels, and overbank areas, and facies C was deposited in inter-channel

swamps. The channels forming the Pottsville Formation were deeper with greater cross-sectional areas, and lower width/depth ratios than those forming the Mauch Chunk Formation. In consequence, maximum clast size is greater as is the thickness of cross-bed sets.

Sandstone petrology, organic matter content, clay mineralogy, and features of the paleosols (Table 1) all show a progressive trend to more highly leaching, less oxidizing (i.e., more humid) conditions higher in the section. Sandstones are compositionally mature throughout the section but become even more mature up section. The Tumbling Run Member of the Pottsville Formation contains the highest variety and proportion of non-quartzose fragments while the Sharp Mountain Member contains the highest proportion of vein quartz (Meckel, 1967). Preservation of organic matter in the upper part of the section implies conditions of low Eh, maintained by continuous saturation by stagnant or slowly moving water. Clay minerals are enriched in alumina and depleted in iron higher in the section indicating a greater degree of chemical and biological leaching.

Paleosols occurring throughout the section are particularly useful in revealing paleo-environmental conditions. Most paleosols of the Pottsville and Llewellyn Formations formed as underclass beneath peat swamps and, therefore, must have been water-saturated during most of their development. In contrast, paleosols of the Mauch Chunk Formation, classified as vertisols by Holbrook (1970), exhibit a variety of features indicating episodic wetting/drying cycles (Table 1).

Caliche, occurring as thin, bed-parallel laminae or in nodular layers less than 3 ft (1 m) in thickness is common in the middle member of the Mauch Chunk (Fig. 2) and occurs occasionally in the upper member. Caliche forms in seasonally arid conditions when surface evaporation produces supersaturation of dissolved salts, especially calcium carbonate and silica. The laminar caliche is interpreted to have formed at the sediment surface in shallow ponds during evaporative cycles (Holbrook, 1970). A surface or near-surface origin is indicated for the nodular caliche as well (Holbrook, 1970) based on: (1) sedimentary laminations that pass from the surrounding sediment into the concretions, (2) nodules occurring as intraformational clasts in conglomerates, (3) the presence of carbonate as nodules in the shales but not as cement in the adjacent sandstones, and (4) ball and pillow structures occurring between the nodules and the underlying (but not the overlying) sediments.

The composition of the organic matter and clay minerals has been strongly influenced by diagenetic conditions during burial. The coal has been elevated to anthracite rank. Expandable layer clays are not present and illite is of the highly ordered 2-M form, representing "anchizone" alteration. Pyrophyllite is an anchizone alteration product of kaolinite that forms only in Fe-depleted rocks (cf., Hosterman and others, 1970, Table 1). Ammonium illite is thought to form at high coal rank in organic matter-rich sediments by nitrogen released during late stages of coalification (Paxton, 1983). These transformations imply temperatures of ca. 225-275°C and 4 to 6 mi (6 to 9 km) of burial.

## TECTONIC SIGNIFICANCE OF THE POTTSTVILLE SECTION

During deposition of the Pottsville section the depositional margin of the basin lay in the vicinity of Philadelphia as indicated by paleocurrent directions and regional trends in maximum grain size (Pelletier, 1958; Meckel, 1967; Wood and others, 1969). Northeast-flowing streams carried sediments toward the basin axis, which trended northeast-southwest across western Pennsylvania. Time equivalent upper Carboniferous rocks are alluvial in eastern Pennsylvania and deltaic and shallow marine to the west (Edmunds and others, 1979). The Mauch Chunk Formation documents a relatively quiescent interval represented variously by fine-grained sedimentation and soil development in the east, an erosional disconformity toward the west, and shallow marine carbonate sedimentation along the basin axis. The influx of coarse elastics in the Pottsville interval has traditionally been ascribed to tectonic uplift in the source (e.g., Meckel, 1967), but while this might be partly true, it is neither a necessary nor sufficient explanation. The simplest explanation is that the change to more humid climatic conditions in the Pennsylvanian produced larger sediment yields and stream discharges. The continued influx of elastic sediments would represent isostatic unloading of the Acadian source terrane.

An additional factor influencing the stratigraphic succession may have been the diversification and proliferation of terrestrial plants during the middle Carboniferous. Plant evolution could

have helped to stabilize stream banks, allowed peat accumulation rates to equal or exceed basin subsidence, and influenced climatic patterns.

The intertonguing of Mauch Chunk and Pottsville facies in the upper member of the Mauch Chunk clearly indicates an alternation of depositional environments, but it is problematical whether this represents the lateral migration of two co-existing subenvironments in the sense of Walther's Law, or the sedimentological adjustment of an entire depositional system to cyclic climatic changes. In the former case, the Pottsville Formation would represent a higher elevation, proximal, more humid facies and the Mauch Chunk a more distal, flood basin facies, subject to wetting more by flooding than by rainfall.

The interpreted tectonic and paleoenvironmental setting during Mauch Chunk deposition would have resembled in many respects the current alluvial plain extending from the Zagros Mountains to the Persian Gulf where arid conditions produce little clastic influx from the tectonically active mountain belt. The adjacent foreland basin axis—lying parallel to the mountain belt—receives primarily carbonate sedimentation. Were a future global climatic change to transform the Middle East into a humid region, the margins of the Persian Gulf could perhaps evolve into a broad peat-forming environment such as existed in the Appalachian basin during Pottsville and Llewellyn times.

## REFERENCES CITED

- Edmunds, W. E., Berg, T. M., Seven, W. D., Piotrowski, R. C., Heyman, L., and Rickard, L. V., 1979, The Mississippian and Pennsylvanian (Carboniferous) systems in the United States; Pennsylvania and New York U.S. Geological Survey Professional Paper 1110-B, 33 p.
- Holbrook, P. W., 1970, The sedimentology and pedology of the Mauch Chunk Formation at Pottsville, Pennsylvania, and their climatic implications [M.S. thesis]: Lancaster, Pennsylvania, Franklin and Marshall College, 111 p.
- Hosterman, J. W., Wood, G. H., Jr., and Bergin, M. J., 1970, Mineralogy of underclass in the Pennsylvania Anthracite region: U.S. Geological Survey Professional Paper 700-C, p. C89-C97.
- Levine, J. R., 1986, Deep burial of coal-bearing strata, Anthracite region, Pennsylvania—Sedimentation or tectonics *Geology*, v. 14, p. 577-580.
- Meckel, L. D., 1967, Origin of Pottsville conglomerates (Pennsylvanian) in the central Appalachians *Geological Society of America Bulletin*, v. 78, p. 223-258.
- Miall, A. D., 1977, A review of the braided river depositional environment *Earth Science Review*, v. 13, p. 1-62.
- Nickelsen, R. P., 1979, Sequence of structural stages of the Alleghany orogeny at the Bear Valley strip mine, Shamokin, Pennsylvania: *American Journal of Science*, v. 279, p. 225-271.
- Paxton, S. T., 1983, Relationships between Pennsylvanian-age lithic sandstone and mudrock diagenesis and coal rank in the central Appalachians [Ph.D. thesis]: University Park, Pennsylvania State University, 503 p.
- Pelletier, B. R., 1958, Pocono paleocurrents in Pennsylvania and Maryland *Geological Society of America Bulletin*, v. 69, p. 1033-1064.
- Read, C. B., and Mamay, S. H., 1964, Upper Paleozoic floral zones and floral provinces of the United States: U.S. Geological Survey Professional Paper 454-K, 35 p.
- Wood, G. H., Jr., and Bergin, M. J., 1970, Structural controls of the Anthracite region, Pennsylvania, in Fisher, G. W., Pettijohn, F. J., Reed, J. C., Jr., and Weaver, K. N., eds., *Studies of Appalachian tectonics; Central and southern*: New York, John Wiley Interscience, p. 161-173.
- Wood, G. H., Jr., Arndt, H. H., Yelonsky, A., and Soren, J., 1956, Subdivision of the Pottsville Formation in Southern Anthracite field, Pennsylvania *American Association of Petroleum Geologists Bulletin*, v. 40, p. 2669-2688.
- Wood, G. H., Jr., Arndt, H. H., and Hoskins, D. M., 1963, Geology of the southern part of the Pennsylvania anthracite region: Annual Meeting of the Geological Society of America, Field Trip Guide Book 4, U.S. and Pennsylvania Geologic Surveys, 84 p.
- Wood, G. H., Jr., Trexler, J. P., and Kehn, T. M., 1969, Geology of the west-central part of the Southern Anthracite field and adjoining areas, Pennsylvania U.S. Geological Survey Professional Paper 602, 150 p.
